# Supplementary material
Source: Springer Nature journal article supplement (https://www.springermedizin.de/resource/supplementary/12882_2012_342_MOESM2_ESM.pdf/9453688)

□ iPTH ≤300 pg/mL

● iPTH >300 pg/mL

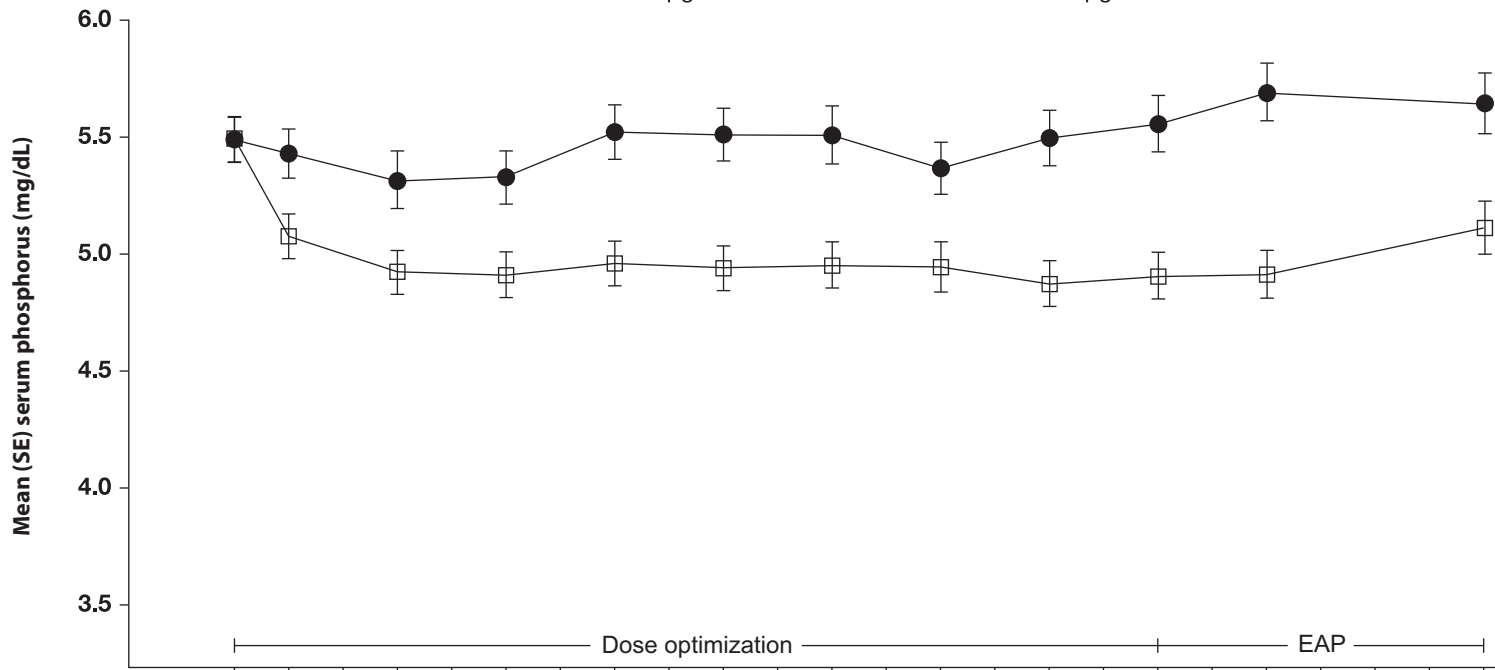

|                      |     |     |     |     |     |     |     |     |     |     |     |     |
|----------------------|-----|-----|-----|-----|-----|-----|-----|-----|-----|-----|-----|-----|
| iPTH ≤300 pg/mL (N): | 300 | 293 | 292 | 287 | 283 | 279 | 273 | 268 | 269 | 266 | 264 | 249 |
| iPTH >300 pg/mL (N): | 239 | 227 | 228 | 225 | 213 | 210 | 201 | 202 | 199 | 188 | 190 | 180 |

Weeks

Supplement: MOESM2 [file 9453688]
